# Supplementary material for: Ancient and Contemporary DNA Reveal a Pre-Human Decline but No Population Bottleneck Associated with Recent Human Persecution in the Kea (Nestor notabilis)
Source: PubMed Central journal article supplement (PMC4342260; doi:10.1371/journal.pone.0118522), 2015-02-26

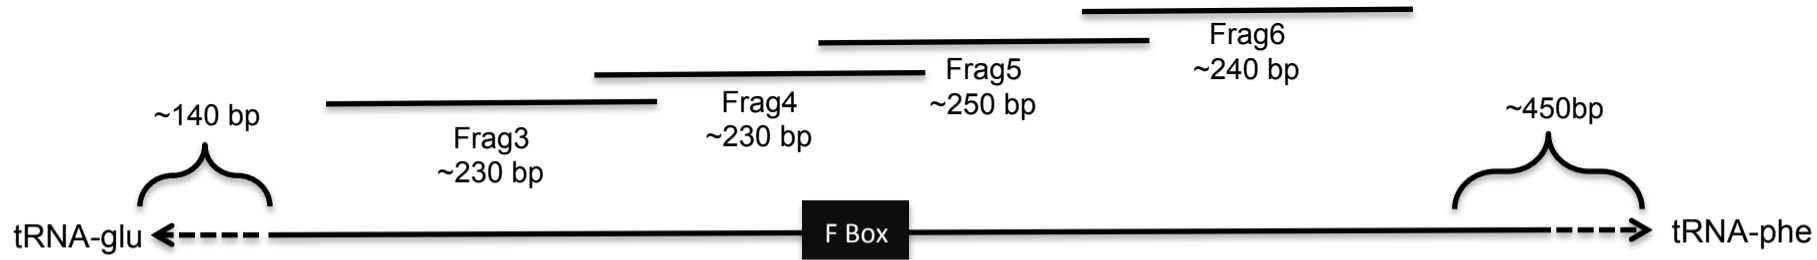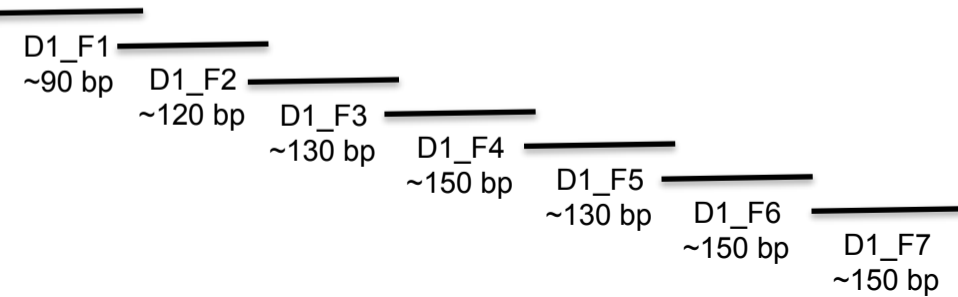

Supplement: pone.0118522.s002.pdf [file pone.0118522.s002.pdf]
