# Supplementary material for: Ancient and Contemporary DNA Reveal a Pre-Human Decline but No Population Bottleneck Associated with Recent Human Persecution in the Kea (Nestor notabilis)
Source: PubMed Central journal article supplement (PMC4342260; doi:10.1371/journal.pone.0118522), 2015-02-26
Supplement: pone.0118522.s003.pdf [file pone.0118522.s003.pdf]

| Fragment                   | Primer   | Sequence (5'-3')            |
|----------------------------|----------|-----------------------------|
| <i>Toepad samples</i>      |          |                             |
| 3                          | Frag 3_F | TCGAATTCAAAGTGCTTTTGC       |
|                            | Frag 3_R | TTCCGTATGGCAAATATATGAATG    |
| 4                          | Frag 4_F | TCACGGAATGGAGACTGTCA        |
|                            | Frag 4_R | CTTACACCGGGTGTGCTGATT       |
| 5                          | Frag 5_F | AAGCTGCATTCGTCCTACCA        |
|                            | Frag 5_R | CAAATAGCGAACCAGATGACTC      |
| 6                          | Frag 6_F | CTCTTTTGC GCCTCTGGTT        |
|                            | Frag 6_R | TACAGGTGCGCCTGGAAT          |
| <i>Fossil bone samples</i> |          |                             |
| 1                          | D1_F1_F  | TGGCCTGAAAAACCATCGTTG       |
|                            | D1_F1_R  | TTGAGGTGAGGATTTGGGGG        |
| 2                          | D1_F2_F  | TGTCAACTCAACTATAAGAACAGCC   |
|                            | D1_F2_R  | AGCAAAAGCACTTTGAATTCGA      |
| 3                          | D1_F3_F  | TGGACTTAATTTTGAATTCAAATTCGA |
|                            | D1_F3_R  | TCTTGATGCATAAATTATTTAGTCCCT |
| 4                          | D1_F4_F  | TCAAAGTGCTTTTGTCTTTTATGTAAT |
|                            | D1_F4_R  | TGAAGCGAAACAGGGGAAAAG       |
| 5                          | D1_F5_F  | TTTATGCATCAAGACATGATTTCCA   |
|                            | D1_F5_R  | TGGTGTCCATTGTTTGTGGG        |
| 6                          | D1_F6_F  | TGGAGACTGTCATGACAAAAGACA    |
|                            | D1_F6_R  | GTAGGACGAATGCAGCTTGC        |
| 7                          | D1_F7_F  | TACCTCCCACACATGGCAAC        |
|                            | D1_F7_R  | ACGCTAGTAGTGTAGGACCTT       |
