# Supplementary material for: Ancient and Contemporary DNA Reveal a Pre-Human Decline but No Population Bottleneck Associated with Recent Human Persecution in the Kea (Nestor notabilis)
Source: PubMed Central journal article supplement (PMC4342260; doi:10.1371/journal.pone.0118522), 2015-02-26
Supplement: pone.0118522.s004.pdf [file pone.0118522.s004.pdf]

| <b>Run #</b> | <b>g</b> | <b>log(<math>N_C</math>)</b> | <b>log(<math>N_H</math>)</b> | <b>log(<math>\theta</math>)</b> | <b>log(<math>T</math>)</b> | <b>log(<math>N_C</math>)</b> | <b>log(<math>N_H</math>)</b> | <b>log(<math>\theta</math>)</b> | <b>log(<math>T</math>)</b> |
|--------------|----------|------------------------------|------------------------------|---------------------------------|----------------------------|------------------------------|------------------------------|---------------------------------|----------------------------|
| 1            | 7        | 3 2                          | 3 2                          | -3.51                           | 3 1                        | 3 2 0 0.5                    | 3 2 0 0.5                    | -3.5 0.25 0 0.5                 | 3 2 0 0.5                  |
| 2            | 7        | 4 1                          | 5 1                          | -3.51                           | 5 1                        | 3 2 0 0.5                    | 3 2 0 0.5                    | -3.5 0.25 0 0.5                 | 3 2 0 0.5                  |
| 3            | 7        | 4 1                          | 6 1                          | -3.51                           | 5 1                        | 3 2 0 0.5                    | 3 2 0 0.5                    | -3.5 0.25 0 0.5                 | 3 2 0 0.5                  |
| 4            | 7        | 4 1                          | 5 1                          | -3.51                           | 3 1                        | 3 2 0 0.5                    | 3 2 0 0.5                    | -3.5 0.25 0 0.5                 | 3 2 0 0.5                  |
| 5            | 7        | 4 1                          | 5 1                          | -3.51                           | 2 1                        | 3 2 0 0.5                    | 3 2 0 0.5                    | -3.5 0.25 0 0.5                 | 3 2 0 0.5                  |
| 6            | 7        | 3 1                          | 5 1                          | -3.51                           | 2 1                        | 3 2 0 0.5                    | 3 2 0 0.5                    | -3.5 0.25 0 0.5                 | 3 2 0 0.5                  |
