# Supplementary material for: Ancient and Contemporary DNA Reveal a Pre-Human Decline but No Population Bottleneck Associated with Recent Human Persecution in the Kea (Nestor notabilis)
Source: PubMed Central journal article supplement (PMC4342260; doi:10.1371/journal.pone.0118522), 2015-02-26
Supplement: pone.0118522.s005.pdf [file pone.0118522.s005.pdf]

| Locus           | Allele/n   | Golden Bay | Kahurangi | Nelson Lakes | Kaikoura | Arthurs Pass | Westland | Mt Cook | Aspiring | Fiordland | Museum samples |
|-----------------|------------|------------|-----------|--------------|----------|--------------|----------|---------|----------|-----------|----------------|
| <b>Nnot14</b>   | <b>N</b>   | 10         | 38        | 22           | 3        | 69           | 92       | 89      | 44       | 43        | 13             |
|                 | <b>198</b> | 0.000      | 0.000     | 0.000        | 0.000    | 0.007        | 0.000    | 0.000   | 0.034    | 0.081     | 0.000          |
|                 | <b>202</b> | 0.000      | 0.000     | 0.000        | 0.000    | 0.000        | 0.005    | 0.017   | 0.023    | 0.012     | 0.000          |
|                 | <b>208</b> | 0.200      | 0.118     | 0.091        | 0.000    | 0.094        | 0.168    | 0.169   | 0.068    | 0.093     | 0.077          |
|                 | <b>214</b> | 0.000      | 0.039     | 0.091        | 0.000    | 0.029        | 0.022    | 0.051   | 0.011    | 0.081     | 0.038          |
|                 | <b>218</b> | 0.250      | 0.342     | 0.432        | 0.667    | 0.529        | 0.533    | 0.438   | 0.398    | 0.279     | 0.385          |
|                 | <b>224</b> | 0.350      | 0.039     | 0.045        | 0.167    | 0.058        | 0.049    | 0.084   | 0.182    | 0.140     | 0.154          |
|                 | <b>228</b> | 0.050      | 0.171     | 0.114        | 0.000    | 0.080        | 0.076    | 0.112   | 0.045    | 0.081     | 0.038          |
|                 | <b>234</b> | 0.050      | 0.237     | 0.205        | 0.000    | 0.087        | 0.049    | 0.073   | 0.080    | 0.093     | 0.115          |
|                 | <b>238</b> | 0.050      | 0.039     | 0.000        | 0.000    | 0.072        | 0.016    | 0.056   | 0.011    | 0.047     | 0.038          |
|                 | <b>244</b> | 0.050      | 0.013     | 0.023        | 0.000    | 0.043        | 0.082    | 0.000   | 0.034    | 0.081     | 0.115          |
| <b>248</b>      | 0.000      | 0.000      | 0.000     | 0.167        | 0.000    | 0.000        | 0.000    | 0.114   | 0.012    | 0.038     |                |
| <b>Strhab16</b> | <b>N</b>   | 10         | 38        | 22           | 3        | 69           | 92       | 89      | 44       | 43        | 13             |
|                 | <b>142</b> | 0.100      | 0.053     | 0.182        | 0.000    | 0.196        | 0.217    | 0.225   | 0.273    | 0.349     | 0.154          |
|                 | <b>146</b> | 0.900      | 0.947     | 0.818        | 1.000    | 0.804        | 0.783    | 0.775   | 0.727    | 0.651     | 0.846          |
| <b>Strhab8</b>  | <b>N</b>   | 10         | 37        | 21           | 1        | 57           | 87       | 81      | 38       | 38        | 14             |
|                 | <b>112</b> | 1.000      | 0.905     | 0.833        | 1.000    | 0.886        | 0.638    | 0.698   | 0.724    | 0.895     | 0.786          |
|                 | <b>120</b> | 0.000      | 0.095     | 0.167        | 0.000    | 0.114        | 0.362    | 0.302   | 0.276    | 0.105     | 0.214          |
| <b>Strhab33</b> | <b>N</b>   | 10         | 38        | 22           | 3        | 69           | 92       | 89      | 44       | 43        | 14             |
|                 | <b>164</b> | 0.000      | 0.000     | 0.000        | 0.000    | 0.014        | 0.022    | 0.011   | 0.284    | 0.116     | 0.107          |
|                 | <b>166</b> | 0.250      | 0.263     | 0.205        | 0.500    | 0.297        | 0.451    | 0.343   | 0.216    | 0.244     | 0.214          |
|                 | <b>168</b> | 0.200      | 0.066     | 0.114        | 0.000    | 0.130        | 0.223    | 0.270   | 0.273    | 0.209     | 0.179          |
|                 | <b>170</b> | 0.400      | 0.355     | 0.295        | 0.333    | 0.319        | 0.092    | 0.191   | 0.136    | 0.384     | 0.286          |
|                 | <b>172</b> | 0.000      | 0.000     | 0.000        | 0.000    | 0.000        | 0.000    | 0.000   | 0.011    | 0.035     | 0.036          |
|                 | <b>174</b> | 0.150      | 0.303     | 0.364        | 0.167    | 0.152        | 0.190    | 0.146   | 0.068    | 0.000     | 0.143          |
|                 | <b>176</b> | 0.000      | 0.013     | 0.023        | 0.000    | 0.087        | 0.022    | 0.039   | 0.011    | 0.012     | 0.036          |
| <b>Strhab13</b> | <b>N</b>   | 10         | 38        | 22           | 3        | 69           | 92       | 89      | 44       | 43        | 14             |
|                 | <b>117</b> | 0.200      | 0.211     | 0.114        | 0.167    | 0.196        | 0.245    | 0.208   | 0.284    | 0.221     | 0.286          |
|                 | <b>121</b> | 0.000      | 0.000     | 0.000        | 0.000    | 0.000        | 0.000    | 0.000   | 0.000    | 0.023     | 0.000          |
|                 | <b>123</b> | 0.050      | 0.039     | 0.182        | 0.000    | 0.138        | 0.092    | 0.185   | 0.136    | 0.047     | 0.071          |
|                 | <b>125</b> | 0.000      | 0.000     | 0.000        | 0.000    | 0.000        | 0.000    | 0.000   | 0.023    | 0.093     | 0.000          |
|                 | <b>128</b> | 0.200      | 0.026     | 0.068        | 0.167    | 0.029        | 0.043    | 0.084   | 0.057    | 0.058     | 0.071          |
|                 | <b>130</b> | 0.050      | 0.303     | 0.273        | 0.000    | 0.130        | 0.071    | 0.197   | 0.159    | 0.372     | 0.286          |
|                 | <b>132</b> | 0.500      | 0.421     | 0.364        | 0.667    | 0.507        | 0.549    | 0.326   | 0.341    | 0.174     | 0.250          |
|                 | <b>134</b> | 0.000      | 0.000     | 0.000        | 0.000    | 0.000        | 0.000    | 0.000   | 0.000    | 0.012     | 0.036          |
| <b>Strhab25</b> | <b>N</b>   | 10         | 38        | 21           | 3        | 67           | 92       | 89      | 44       | 43        | 14             |
|                 | <b>177</b> | 0.200      | 0.250     | 0.214        | 0.000    | 0.239        | 0.397    | 0.388   | 0.307    | 0.477     | 0.393          |
|                 | <b>181</b> | 0.000      | 0.000     | 0.000        | 0.000    | 0.000        | 0.005    | 0.000   | 0.068    | 0.093     | 0.000          |
|                 | <b>185</b> | 0.500      | 0.263     | 0.286        | 0.500    | 0.194        | 0.304    | 0.309   | 0.261    | 0.221     | 0.357          |
|                 | <b>189</b> | 0.050      | 0.066     | 0.238        | 0.000    | 0.201        | 0.207    | 0.180   | 0.261    | 0.151     | 0.179          |
|                 | <b>193</b> | 0.100      | 0.132     | 0.119        | 0.167    | 0.007        | 0.011    | 0.000   | 0.000    | 0.000     | 0.000          |
|                 | <b>197</b> | 0.150      | 0.118     | 0.095        | 0.333    | 0.216        | 0.022    | 0.034   | 0.034    | 0.035     | 0.036          |
|                 | <b>201</b> | 0.000      | 0.171     | 0.048        | 0.000    | 0.142        | 0.054    | 0.090   | 0.068    | 0.023     | 0.036          |

| Locus           | Allele/n   | Golden Bay | Kahurangi | Nelson Lakes | Kaikoura | Arthurs Pass | Westland | Mt Cook | Aspiring | Fiordland | Museum samples |
|-----------------|------------|------------|-----------|--------------|----------|--------------|----------|---------|----------|-----------|----------------|
| <b>Nnot24</b>   | <b>N</b>   | 8          | 35        | 22           | 3        | 67           | 85       | 86      | 43       | 43        | 15             |
|                 | <b>159</b> | 0.000      | 0.000     | 0.000        | 0.000    | 0.000        | 0.000    | 0.000   | 0.035    | 0.151     | 0.033          |
|                 | <b>163</b> | 0.438      | 0.100     | 0.114        | 0.000    | 0.090        | 0.288    | 0.209   | 0.372    | 0.279     | 0.200          |
|                 | <b>167</b> | 0.563      | 0.843     | 0.841        | 1.000    | 0.888        | 0.618    | 0.715   | 0.477    | 0.326     | 0.767          |
|                 | <b>171</b> | 0.000      | 0.057     | 0.045        | 0.000    | 0.022        | 0.094    | 0.076   | 0.116    | 0.244     | 0.000          |
| <b>Strhab35</b> | <b>N</b>   | 10         | 37        | 22           | 3        | 67           | 91       | 88      | 44       | 42        | 14             |
|                 | <b>149</b> | 0.050      | 0.162     | 0.205        | 0.167    | 0.172        | 0.159    | 0.148   | 0.227    | 0.274     | 0.143          |
|                 | <b>155</b> | 0.100      | 0.095     | 0.068        | 0.000    | 0.216        | 0.203    | 0.205   | 0.409    | 0.167     | 0.250          |
|                 | <b>158</b> | 0.100      | 0.014     | 0.136        | 0.333    | 0.119        | 0.143    | 0.193   | 0.250    | 0.333     | 0.036          |
|                 | <b>160</b> | 0.450      | 0.378     | 0.318        | 0.500    | 0.269        | 0.220    | 0.239   | 0.091    | 0.214     | 0.357          |
|                 | <b>163</b> | 0.150      | 0.081     | 0.045        | 0.000    | 0.037        | 0.011    | 0.023   | 0.011    | 0.000     | 0.036          |
|                 | <b>165</b> | 0.000      | 0.027     | 0.000        | 0.000    | 0.000        | 0.000    | 0.011   | 0.000    | 0.000     | 0.000          |
|                 | <b>167</b> | 0.100      | 0.230     | 0.227        | 0.000    | 0.172        | 0.264    | 0.182   | 0.011    | 0.012     | 0.143          |
|                 | <b>169</b> | 0.050      | 0.014     | 0.000        | 0.000    | 0.015        | 0.000    | 0.000   | 0.000    | 0.000     | 0.036          |
| <b>Cfor0809</b> | <b>N</b>   | 10         | 38        | 22           | 3        | 68           | 90       | 85      | 36       | 43        | 11             |
|                 | <b>182</b> | 0.000      | 0.000     | 0.000        | 0.000    | 0.007        | 0.000    | 0.000   | 0.000    | 0.035     | 0.000          |
|                 | <b>188</b> | 0.950      | 0.947     | 0.955        | 0.667    | 0.897        | 0.733    | 0.735   | 0.681    | 0.733     | 0.818          |
|                 | <b>192</b> | 0.050      | 0.053     | 0.045        | 0.333    | 0.081        | 0.261    | 0.218   | 0.306    | 0.163     | 0.136          |
|                 | <b>196</b> | 0.000      | 0.000     | 0.000        | 0.000    | 0.015        | 0.006    | 0.047   | 0.014    | 0.023     | 0.045          |
|                 | <b>200</b> | 0.000      | 0.000     | 0.000        | 0.000    | 0.000        | 0.000    | 0.000   | 0.000    | 0.047     | 0.000          |
| <b>Nnot37</b>   | <b>N</b>   | 10         | 37        | 21           | 3        | 69           | 92       | 87      | 43       | 42        | 14             |
|                 | <b>247</b> | 0.250      | 0.392     | 0.310        | 0.000    | 0.333        | 0.293    | 0.259   | 0.140    | 0.131     | 0.250          |
|                 | <b>249</b> | 0.750      | 0.608     | 0.690        | 1.000    | 0.667        | 0.707    | 0.741   | 0.860    | 0.869     | 0.750          |
| <b>Nnot38</b>   | <b>N</b>   | 10         | 38        | 22           | 3        | 69           | 92       | 89      | 44       | 43        | 13             |
|                 | <b>213</b> | 0.800      | 0.763     | 0.773        | 0.833    | 0.884        | 0.864    | 0.910   | 0.920    | 0.791     | 1.000          |
|                 | <b>216</b> | 0.200      | 0.237     | 0.227        | 0.167    | 0.116        | 0.136    | 0.090   | 0.080    | 0.209     | 0.000          |
| <b>Nnot39</b>   | <b>N</b>   | 10         | 38        | 22           | 3        | 68           | 92       | 88      | 44       | 43        | 14             |
|                 | <b>223</b> | 0.750      | 0.592     | 0.659        | 1.000    | 0.824        | 0.723    | 0.756   | 0.920    | 0.814     | 0.857          |
|                 | <b>225</b> | 0.250      | 0.408     | 0.341        | 0.000    | 0.176        | 0.277    | 0.244   | 0.080    | 0.186     | 0.143          |
| <b>Nnot43</b>   | <b>N</b>   | 10         | 38        | 22           | 3        | 69           | 91       | 86      | 44       | 43        | 15             |
|                 | <b>173</b> | 0.400      | 0.316     | 0.341        | 0.833    | 0.486        | 0.582    | 0.512   | 0.443    | 0.384     | 0.567          |
|                 | <b>177</b> | 0.600      | 0.684     | 0.659        | 0.167    | 0.514        | 0.418    | 0.471   | 0.545    | 0.616     | 0.433          |
|                 | <b>181</b> | 0.000      | 0.000     | 0.000        | 0.000    | 0.000        | 0.000    | 0.017   | 0.011    | 0.000     | 0.000          |
| <b>Nnot49</b>   | <b>N</b>   | 10         | 37        | 22           | 3        | 68           | 91       | 89      | 43       | 42        | 15             |
|                 | <b>206</b> | 0.950      | 0.851     | 0.886        | 0.833    | 0.875        | 0.901    | 0.927   | 0.977    | 0.714     | 0.933          |
|                 | <b>208</b> | 0.050      | 0.149     | 0.114        | 0.167    | 0.125        | 0.099    | 0.073   | 0.023    | 0.286     | 0.067          |
| <b>Nnot8</b>    | <b>N</b>   | 9          | 38        | 22           | 3        | 69           | 92       | 89      | 44       | 43        | 14             |
|                 | <b>164</b> | 0.389      | 0.539     | 0.477        | 0.667    | 0.457        | 0.560    | 0.612   | 0.852    | 0.651     | 0.607          |
|                 | <b>166</b> | 0.000      | 0.000     | 0.000        | 0.000    | 0.000        | 0.005    | 0.000   | 0.000    | 0.012     | 0.000          |
|                 | <b>168</b> | 0.611      | 0.461     | 0.523        | 0.333    | 0.543        | 0.435    | 0.388   | 0.148    | 0.337     | 0.393          |
