# Supplementary material for: Ancient and Contemporary DNA Reveal a Pre-Human Decline but No Population Bottleneck Associated with Recent Human Persecution in the Kea (Nestor notabilis)
Source: PubMed Central journal article supplement (PMC4342260; doi:10.1371/journal.pone.0118522), 2015-02-26
Supplement: pone.0118522.s006.pdf [file pone.0118522.s006.pdf]

***K-max = 2***

| Sample                | Sampling location | Putative cluster of origin | Q values    |             |
|-----------------------|-------------------|----------------------------|-------------|-------------|
|                       |                   |                            | North       | South       |
| LB2467                | Sumner            | North                      | 0.98        | 0.02        |
| NMW 12.208            | Arthurs           | North                      | 0.94        | 0.06        |
| NMW 12.209            | Arthurs           | North                      | 0.96        | 0.04        |
| LB2466                | Arthurs           | North                      | 0.97        | 0.03        |
| NMW 49.760            | Porters           | North                      | 0.88        | 0.12        |
| AV84                  | Coleridge         | North                      | 0.96        | 0.04        |
| AV86                  | Coleridge         | North                      | 0.92        | 0.08        |
| AV88                  | Coleridge         | North                      | 0.97        | 0.03        |
| AV89                  | Coleridge         | North                      | 0.86        | 0.14        |
| AV90                  | Coleridge         | North                      | 0.96        | 0.04        |
| AV91                  | Coleridge         | North                      | 0.98        | 0.02        |
| <b>NMW 12.211</b>     | <b>Coleridge</b>  | <b>North</b>               | <b>0.56</b> | <b>0.44</b> |
| AV2039                | Tekapo            | North                      | 0.86        | 0.14        |
| <b>1927.12.18.125</b> | <b>Cook</b>       | <b>North</b>               | <b>0.66</b> | <b>0.34</b> |
| LB2469                | Milford           | South                      | 0.02        | 0.98        |

***K-max = 3***

| Sample                | Sampling location | Putative cluster of origin | Q values    |             |             |
|-----------------------|-------------------|----------------------------|-------------|-------------|-------------|
|                       |                   |                            | North       | Central     | South       |
| LB2467                | Sumner            | North                      | 0.77        | 0.22        | 0.02        |
| <b>NMW 12.208</b>     | <b>Arthurs</b>    | <b>North</b>               | <b>0.34</b> | <b>0.64</b> | <b>0.02</b> |
| NMW 12.209            | Arthurs           | North                      | 0.63        | 0.35        | 0.03        |
| LB2466                | Arthurs           | North                      | 0.56        | 0.41        | 0.03        |
| <b>NMW 49.760</b>     | <b>Porters</b>    | <b>North</b>               | <b>0.39</b> | <b>0.57</b> | <b>0.04</b> |
| AV84                  | Coleridge         | North                      | 0.59        | 0.38        | 0.03        |
| AV86                  | Coleridge         | North                      | 0.61        | 0.34        | 0.05        |
| AV88                  | Coleridge         | North                      | 0.61        | 0.37        | 0.02        |
| AV89                  | Coleridge         | North                      | 0.48        | 0.46        | 0.06        |
| AV90                  | Coleridge         | North                      | 0.53        | 0.45        | 0.03        |
| AV91                  | Coleridge         | North                      | 0.60        | 0.38        | 0.02        |
| <b>NMW 12.211</b>     | <b>Coleridge</b>  | <b>North</b>               | <b>0.44</b> | <b>0.28</b> | <b>0.28</b> |
| AV2039                | Tekapo            | Central                    | 0.34        | 0.64        | 0.02        |
| <b>1927.12.18.125</b> | <b>Cook</b>       | <b>Central</b>             | <b>0.26</b> | <b>0.69</b> | <b>0.05</b> |
| LB2469                | Milford           | South                      | 0.03        | 0.04        | 0.92        |
